# Supplementary material for: Adaption of an Episomal Antisense Silencing Approach for Investigation of the Phenotype Switch of Staphylococcus aureus Small-Colony Variants
Source: PubMed Central journal article supplement (PMC6738336; doi:10.3389/fmicb.2019.02044), 2019-09-04
Supplement: Table_1.pdf [file Table_1.pdf]

## Supplementary Material

### 1 Supplementary Tables

**Table S1.** Oligonucleotides used in this study for amplification of different *fabI* fragments

| Oligonucleotide primer <sup>1</sup> | Sequence (5' → 3') <sup>2</sup>                          | Reference  |
|-------------------------------------|----------------------------------------------------------|------------|
| <i>fabI</i> -AS-F- <i>EcoRI</i>     | GCG <b>CGA ATT</b> CCA AAA CAT ATG TCA TCA<br>TGG GAA T  | This study |
| <i>fabI</i> -AS-R- <i>KpnI</i>      | GCG <b>CGG TAC CTT</b> TAG CTT CAT GAG CCA<br>CAA T      | This study |
| 2-AS- <i>fabI</i> -F- <i>EcoRI</i>  | GCG <b>CGA ATT</b> CAT TAT AAG GAG TTA TCT<br>TAC ATG TT | This study |
| 2-AS- <i>fabI</i> -R- <i>KpnI</i>   | GCG <b>CGG TAC CAC</b> TTT AGC GAC ACC AAA<br>AGC AAT    | This study |
| 3-AS- <i>fabI</i> -R- <i>KpnI</i>   | GCG <b>CGG TAC CTA</b> CGT TCT TTA CGG TAA<br>GTA AAT    | This study |
| 4-AS- <i>fabI</i> -R- <i>KpnI</i>   | GCG <b>CGG TAC CTA</b> CGC TTA TTA GCG ATT<br>CCC A      | This study |
| 10-AS- <i>fabI</i> -R- <i>KpnI</i>  | GCG <b>CGG TAC CTT</b> GAA TGA TAT ACA CCA<br>TCA ATA TT | This study |
| 11-AS- <i>fabI</i> -F- <i>EcoRI</i> | GCG <b>CGA ATT</b> CGG TTT CAA TAC AAT TCT<br>TAA AGA AA | This study |
| 11-AS- <i>fabI</i> -R- <i>KpnI</i>  | GCG <b>CGGTACCGAATCCGCTATCTACATGAATA</b><br>TT           | This study |
| 16-AS- <i>fabI</i> -R- <i>KpnI</i>  | GCG <b>CGGTACCCGCTTCTGGTTGATTTAATTGT</b><br>TC           | This study |

<sup>1</sup> *fabI*, enoyl-acyl-carrier-protein reductase gene.

<sup>2</sup> Restriction sites are given in bold.

**Table S2.** Characteristics of the antisense *fabI* fragments used for antisense silencing

| Oligonucleotide combination <sup>1</sup>                                    | Length (bp) | Region (bp) <sup>2</sup> | GC content (%) | Number of possible structures | Initial $\Delta G$ (kcal/mol) <sup>3</sup> | Number of loops <sup>4</sup> |
|-----------------------------------------------------------------------------|-------------|--------------------------|----------------|-------------------------------|--------------------------------------------|------------------------------|
| <i>fabI</i> -AS-F- <i>EcoRI</i> +<br><i>fabI</i> -AS-R- <i>KpnI</i>         | 382         | +18 to +399              | 34.8           | 10                            | -70.3                                      | 20                           |
| 2-AS- <i>fabI</i> -F- <i>EcoRI</i> +<br>4-AS- <i>fabI</i> -R- <i>KpnI</i>   | 75          | -20 to +55               | 29.3           | 1                             | -11.8                                      | 4                            |
| 2-AS- <i>fabI</i> -F- <i>EcoRI</i> +<br>2-AS- <i>fabI</i> -R- <i>KpnI</i>   | 100         | -20 to +80               | 32.0           | 2                             | -12.8                                      | 5                            |
| 2-AS- <i>fabI</i> -F- <i>EcoRI</i> +<br>3-AS- <i>fabI</i> -R- <i>KpnI</i>   | 150         | -20 to +130              | 30.7           | 9                             | -16.5                                      | 8                            |
| 11-AS- <i>fabI</i> -F- <i>EcoRI</i> +<br>11-AS- <i>fabI</i> -R- <i>KpnI</i> | 150         | +607 to +756             | 36.7           | 2                             | -19.0                                      | 10                           |
| 2-AS- <i>fabI</i> -F- <i>EcoRI</i> +<br>16-AS- <i>fabI</i> -R- <i>KpnI</i>  | 200         | -20 to +180              | 31.5           | 6                             | -30.6                                      | 12                           |
| 2-AS- <i>fabI</i> -F- <i>EcoRI</i> +<br>10-AS- <i>fabI</i> -R- <i>KpnI</i>  | 300         | -20 to +280              | 31.3           | 6                             | -45.6                                      | 16                           |

<sup>1</sup> *fabI*, enoyl-acyl-carrier-protein reductase gene.

<sup>2</sup> Fragments starting at position -20 cover the Shine-Dalgarno sequence.

<sup>3</sup> Secondary sequence structure prediction was performed using the Mfold web server (Zuker, 2003) with default settings and using antisense fragments without restriction sites. The structure exhibiting the lowest  $\Delta G$  is given.

<sup>4</sup> Amount of loops is given for the structure exhibiting the lowest  $\Delta G$ .

### References

Zuker, M. (2003). Mfold web server for nucleic acid folding and hybridization prediction. *Nucleic Acids Res.* 31, 3406–15. doi:10.1093/NAR/GKG595.
